# Supplementary material for: Vanillin-crosslinked chitosan/ZnO nanocomposites as a drug delivery system for 5-fluorouracil: study on the release behaviorviamesoporous ZrO2–Co3O4nanoparticles modified sensor and antitumor activity
Source: Royal Society of Chemistry journal article supplement (doi:10.1039/d2ra02717h), 2022-01-01

# Vanillin-crosslinked chitosan/ZnO nanocomposites as drug delivery system for 5-Fluorouracil: study the release behavior via mesoporous $\text{ZrO}_2\text{-Co}_3\text{O}_4$ nano-oxides modified sensor and antitumor activity

Nehal Salahuddin <sup>a\*</sup>, Salem Awad, Mona Elfiky <sup>a\*</sup>

<sup>a</sup> Chemistry Department, Faculty of Science, Tanta, 31527, Egypt.

E-mail address: [Nehal.ataf@science.tanta.edu.eg](mailto:Nehal.ataf@science.tanta.edu.eg) & [Elfiky\\_mona@science.tanta.edu.eg](mailto:Elfiky_mona@science.tanta.edu.eg)

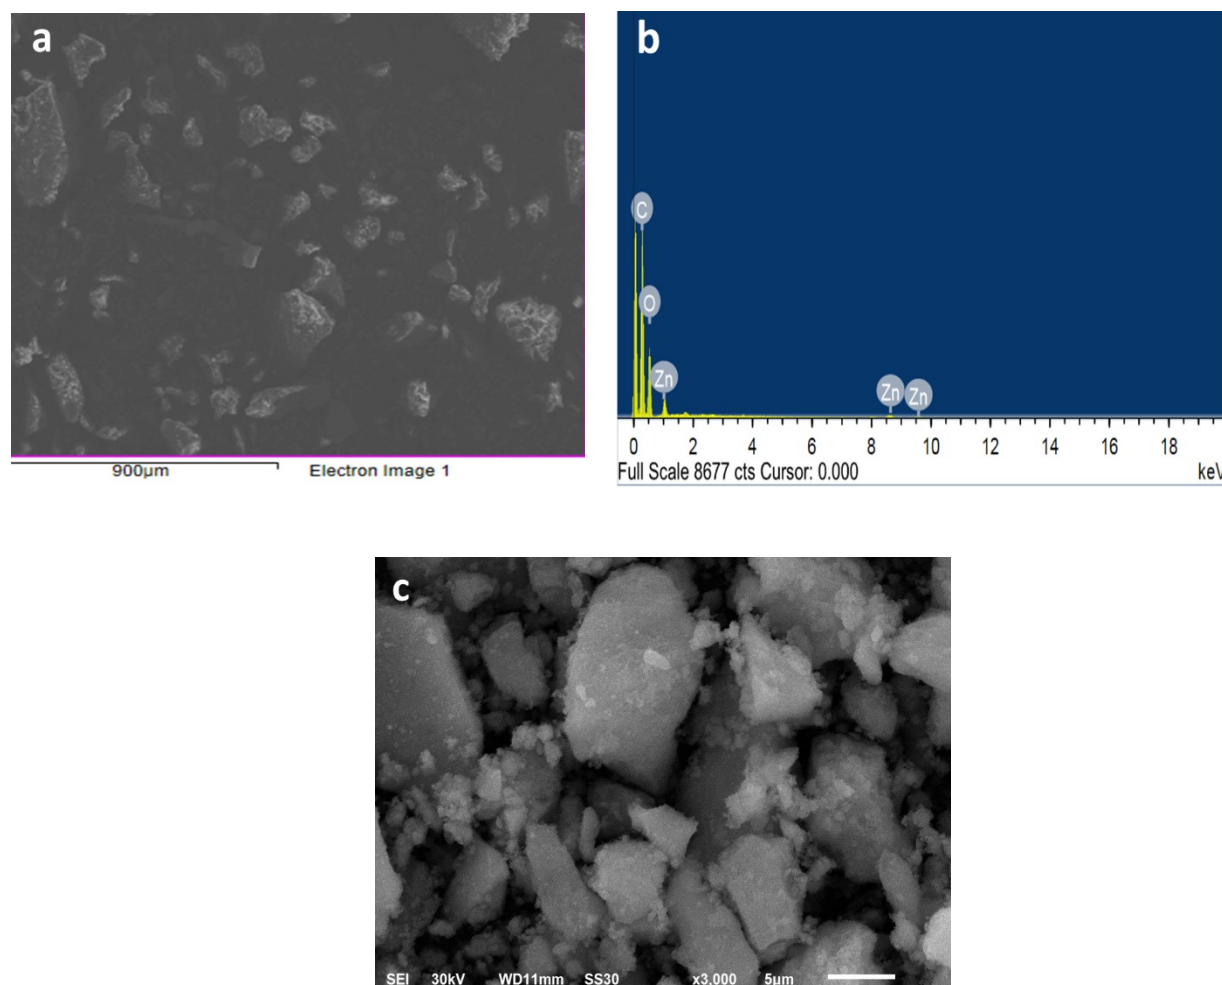

**Fig. S1.** EDX analysis of CV<sub>5</sub> (a&b), SEM of mesoporous  $\text{ZrO}_2\text{-Co}_3\text{O}_4$  NPs (c)

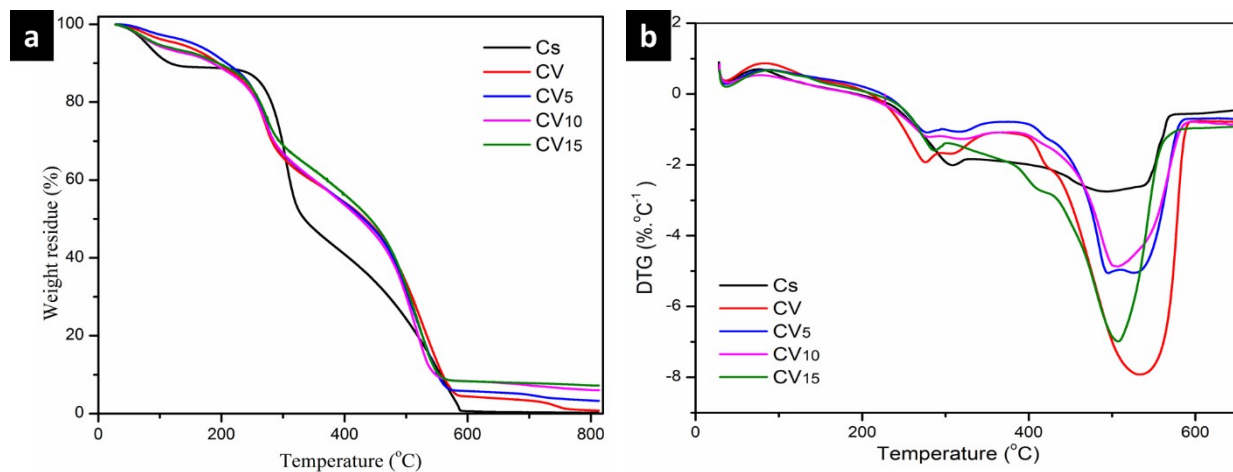

**Fig. S2.** (a) TGA and (b) DTG of CS, CV, CV<sub>5</sub>, CV<sub>10</sub> and CV<sub>15</sub>.

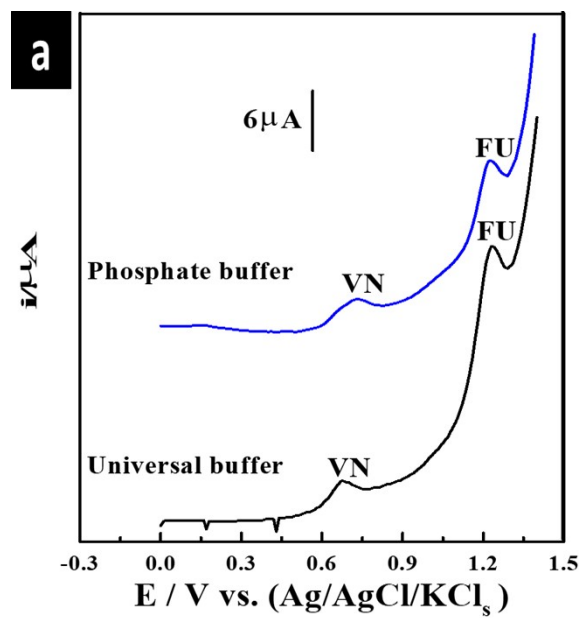

**Fig. S3.** Effect of different types of buffer solutions at the 1.0% [ZrO<sub>2</sub>-Co<sub>3</sub>O<sub>4</sub> NPs] MCPS ( $a = 25$  mV,  $f = 60$  Hz, and  $\Delta E_s = 10$  mV).

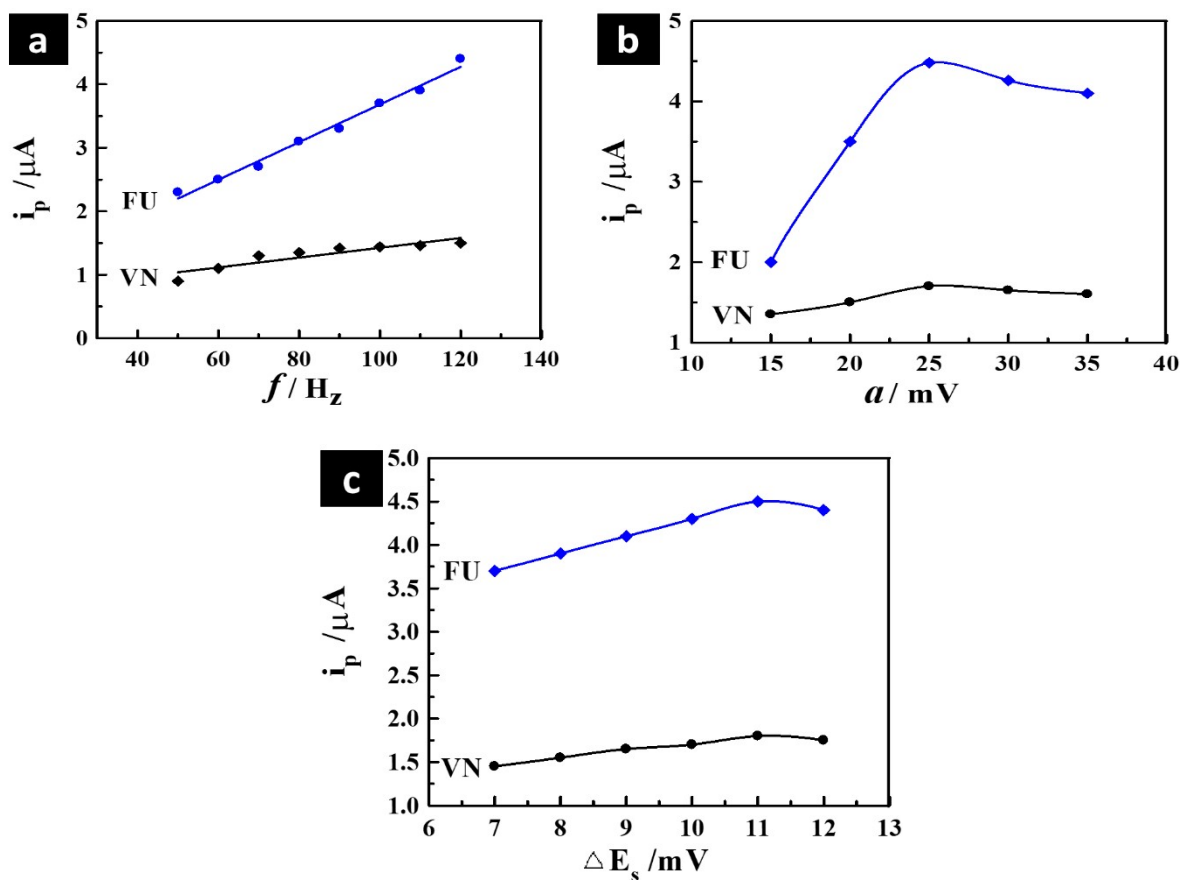

**Fig. S4.** Influence of changing of (A) frequency ( $f$ ), (B) pulse amplitude ( $a$ ), and (C) scan increment ( $E_s$ ) using co-mixed liquor of 4.5  $\mu M$  5-FU and 0.65  $\mu M$  Vn upon 1.0 % [ $ZrO_2-Co_3O_4$  NPs] MCPS at  $E_{acc}=0V$  and  $t_{acc}=12s$ .

**Fig.S5.** *In-vitro* release of 5-FU from 5-FU/CV, 5-FU/CV<sub>5</sub>, 5-FU/CV<sub>10</sub> and 5-FU/CV<sub>15</sub> new and 6 months stores samples at pH 5.4 and pH 7.4.

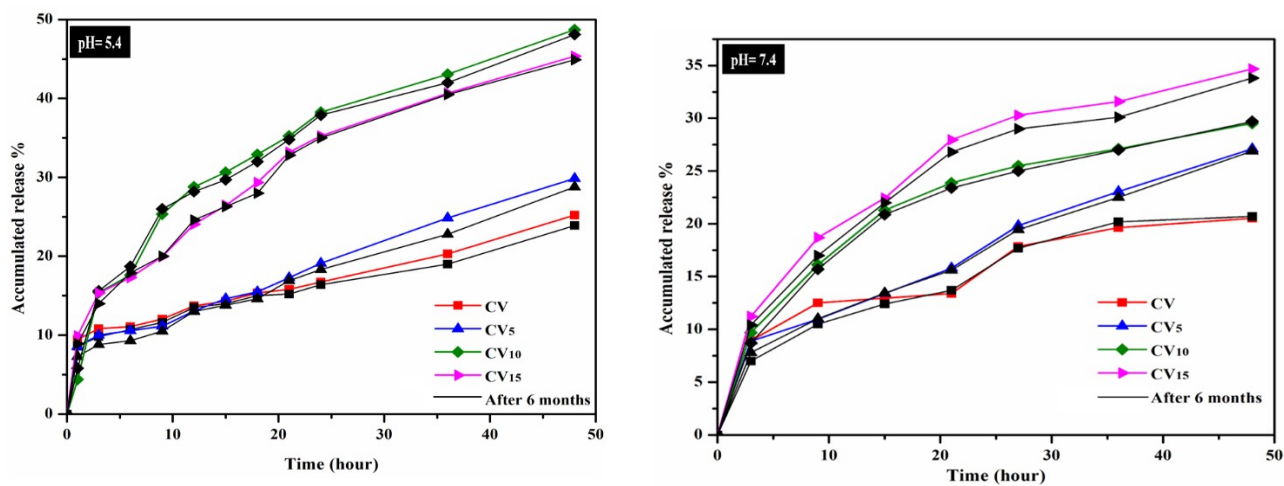

Supplement: d2ra02717h1.pdf [file d2ra02717h1.pdf]
